# Supplementary material for: A Living Cell Repository of the Cranio-/Orofacial Region to Advance Research and Promote Personalized Medicine
Source: PubMed Central journal article supplement (PMC8222786; doi:10.3389/fcell.2021.682944), 2021-06-10
Supplement: Data_Sheet_1.pdf [file Data_Sheet_1.pdf]

## *Supplementary Material*

### **A Living Cell Repository of the Cranio-/Orofacial Region to Advance Research and Promote Personalized Medicine**

Ludovica Parisi<sup>1</sup>, Patrick O Knapp<sup>1</sup>, Eleftheria Girousi<sup>1</sup>, Silvia Rihs<sup>1</sup>, Giorgio C La Scala<sup>2</sup>, Isabelle Schnyder<sup>3</sup>, Alexandra Stähli<sup>4</sup>, Anton Sculean<sup>4</sup>, Dieter D Bosshardt<sup>4,5</sup>, Christos Katsaros<sup>1</sup>, Martin Degen<sup>1\*</sup>

\* **Correspondence:** Martin Degen  
martin.degen@zmk.unibe.ch

#### **1 Supplementary Tables**

| Gene                | Forward (5' - 3')       | Reverse (5' - 3')        |
|---------------------|-------------------------|--------------------------|
| <b><i>FN</i></b>    | CCATTATTGGGTACCGCATCACA | AGGAGGAACAGCCGTTTGTGT    |
| <b><i>KRT14</i></b> | GGCCTGCTGAGATCAAAGACTAC | CACTGTGGCTGTGAGAATCTTGTT |
| <b><i>CDH1</i></b>  | AGAACGCATTGCCACATACACT  | TCTGATCGGTTACCGTGATCAA   |
| <b><i>TNC</i></b>   | TCAAAGACGTGCCAGGAGAC    | TCTGTCTGGGAAACACGTCTG    |
| <b><i>LAMA3</i></b> | TCAGCACATATTATCTGGGAGG  | AAATTTTTCATGCAGCCTCG     |
| <b><i>TGFβ1</i></b> | TCCTGTGACAGCAGGGATAAC   | TCCGTGGAGCTGAAGCAATA     |
| <b><i>IRF6</i></b>  | GCTCTTCCATATCATGGCCCTC  | CTACAGCCCAGGCCTTAAAAA    |
| <b><i>αSMA</i></b>  | CAGGGCTGTTTTCCCATCCAT   | GCCATGTTCTATCGGGTACTTC   |
| <b><i>COL3</i></b>  | AACAGGAAGCTGTTGAAGGAGG  | CTGTGGGCAAACCTGCACAAC    |
| <b><i>CD73</i></b>  | CCAGTACCAGGGCACTATCTG   | TGGCTCGATCAGTCCTTCCA     |
| <b><i>CD90</i></b>  | ATCGCTCTCCTGCTAACAGTC   | CTCGTACTGGATGGGTGAACT    |
| <b><i>CD105</i></b> | TGCACTTGGCCTACAATTCCA   | AGCTGCCACTCAAGGATCT      |
| <b><i>GAPDH</i></b> | CTCTGACTTCAACAGCGACACCC | TCCTCTTGTGCTCTTGTCTGGGGC |

**Supplementary Table 1.** Sequence of the qPCR primers used in this study.

| Assay | Protein                       | Type       | Clone   | Company                             |
|-------|-------------------------------|------------|---------|-------------------------------------|
| IF    | Laminin- $\gamma$ 2           | monoclonal | E-6     | sc-28330, Santa Cruz                |
|       | Fibronectin                   | polyclonal | /       | Wehrle-Haller et al., 1991          |
|       | E-Cadherin                    | polyclonal | /       | 2084-1-AP, Proteintech              |
|       | Vinculin                      | monoclonal | hVIN-1  | V9131, Sigma-Aldrich                |
| WB    | Fibronectin                   | polyclonal | /       | Wehrle-Haller et al., 1991          |
|       | E-Cadherin                    | polyclonal | /       | 2084-1-AP, Proteintech              |
|       | IRF6                          | monoclonal | 14B2C16 | 674502, BioLegend                   |
|       | Vinculin                      | monoclonal | hVIN-1  | V9131, Sigma-Aldrich                |
|       | $\beta$ -Actin                | monoclonal | C4      | sc47778, Santa Cruz                 |
| IHC   | E-Cadherin                    | monoclonal | HECD-1  | 13-17000, Thermo Fisher Scientific  |
|       | Vimentin                      | monoclonal | 3B4     | M7020, Dako Agilent                 |
|       | Alpha smooth actin            | monoclonal | 1A4     | 1A4, Sigma-Aldrich                  |
|       | Skeletal Myosin, fast, Myo II | monoclonal | MY-32   | M-4276, Sigma-Aldrich               |
|       | PCNA                          | polyclonal | /       | ab18197, abcam                      |
|       | Loricrin                      | polyclonal | /       | PA5-30583, Thermo Fisher Scientific |

**Supplementary Table 2.** Antibodies used in this study. IF: Immunofluorescence; WB: Western Blot; IHC: Immunohistochemistry.

Wehrle-Haller, B., Koch, M., Baumgartner, S., Spring, J., and Chiquet, M. (1991). Nerve-dependent and -independent tenascin expression in the developing chick limb bud. *Development* 112, 627-637.

|      | Category          | # Samples | Cells |    | Donor Sex |   | Donor Age | Specifics |          |
|------|-------------------|-----------|-------|----|-----------|---|-----------|-----------|----------|
|      |                   |           | Ep    | Fb | M         | F |           | healthy   | diseased |
| Skin | Thumb             | 1         | X     | X  | 0         | 1 | 2-4 years |           | 1        |
|      | Scar (ankle)      | 1         |       | X  | 0         | 1 | 39 years  |           | 1        |
| MJ   | Foreskin          | 7         | X     | X  | 7         | 0 | 4-8 years | 7         |          |
| M    | Synovial Membrane | 1         |       | X  | 0         | 1 | 39 years  |           | 1        |

**Supplementary Table 3.** Non-cranio-/orofacial-derived cells. MJ: mucocutaneous junction area; M: mucosa; Ep: epithelial cells; Fb: fibroblasts; M: male; F: female.

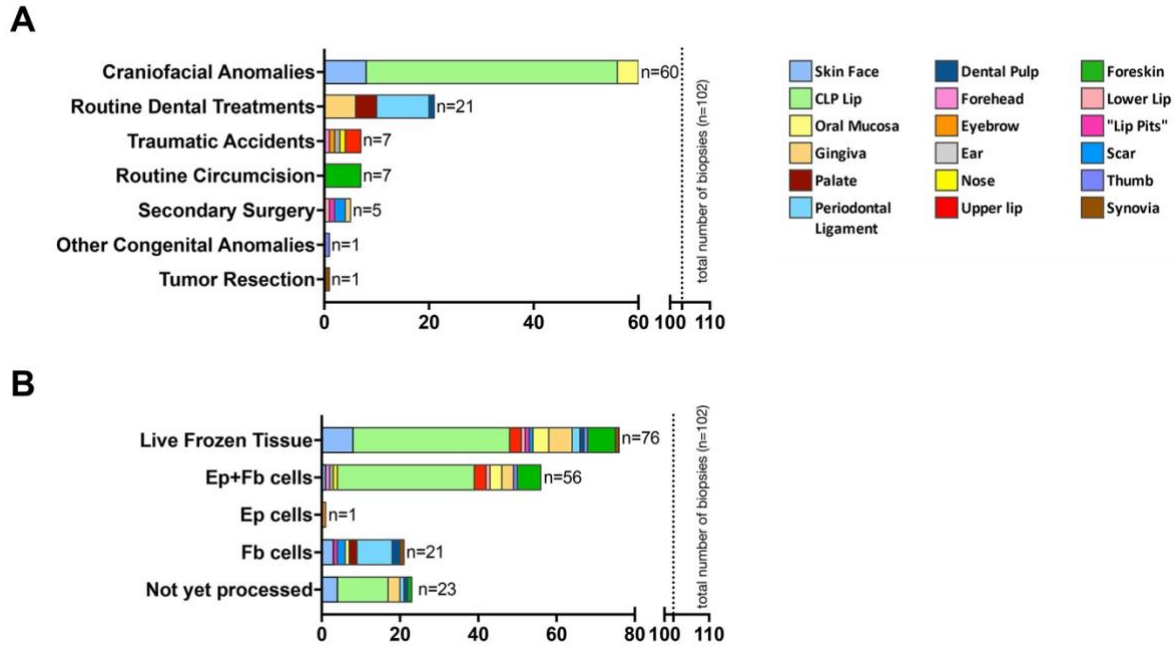

**Supplementary Figure 1:** Overall description of our living cell repository. (A) Bar chart reporting the source of the specimens that were obtained for the generation of the living cell biobank. Total number of biopsies: 102 (92 biopsies derived from the cranio-/orofacial region, 10 biopsies derived from other regions). (B) Bar chart of the outcome after tissue biopsy processing. Total number of biopsies: 102. The color code is shown in the legend.
